# Supplementary material for: Effect of DPP-IV Inhibitors on Glycemic Variability in Patients with T2DM: A Systematic Review and Meta-Analysis
Source: PubMed Central journal article supplement (PMC6746852; doi:10.1038/s41598-019-49803-9), 2019-09-16
Supplement: 41598_2019_49803_MOESM1_ESM.pdf [file 41598_2019_49803_MOESM1_ESM.pdf]

# **Effect of DPP-IV Inhibitors on Glycemic Variability in Patients with T2DM: A Systematic Review and Meta-Analysis**

Subin Lee, Heeyoung Lee, Yoon Hye Kim, Eunyoung Kim

|                | Random sequence generation (selection bias) | Allocation concealment (selection bias) | Blinding of participants and personnel (performance bias) | Blinding of outcome assessment (detection bias) | Incomplete outcome data (attrition bias) | Selective reporting (reporting bias) | Other bias |
|----------------|---------------------------------------------|-----------------------------------------|-----------------------------------------------------------|-------------------------------------------------|------------------------------------------|--------------------------------------|------------|
| Kim HS et al.  | ?                                           | ?                                       | +                                                         | ?                                               | +                                        | +                                    | -          |
| Kim G et al.   | ?                                           | ?                                       | -                                                         | ?                                               | +                                        | +                                    | -          |
| Kim NH et al.  | ?                                           | ?                                       | -                                                         | ?                                               | +                                        | +                                    | -          |
| Suzuki et al.  | ?                                           | ?                                       | -                                                         | ?                                               | +                                        | +                                    | -          |
| Park SE et al. | ?                                           | +                                       | -                                                         | +                                               | +                                        | +                                    | -          |
| Park KS et al. | -                                           | ?                                       | -                                                         | ?                                               | +                                        | +                                    | -          |
| Xiao et al.    | ?                                           | ?                                       | -                                                         | ?                                               | +                                        | +                                    | -          |
