# Supplementary material for: Effect of DPP-IV Inhibitors on Glycemic Variability in Patients with T2DM: A Systematic Review and Meta-Analysis
Source: PubMed Central journal article supplement (PMC6746852; doi:10.1038/s41598-019-49803-9), 2019-09-16

# **Effect of DPP-IV Inhibitors on Glycemic Variability in Patients with T2DM: A Systematic Review and Meta-Analysis**

Subin Lee, Heeyoung Lee, Yoon Hye Kim, Eunyoung Kim

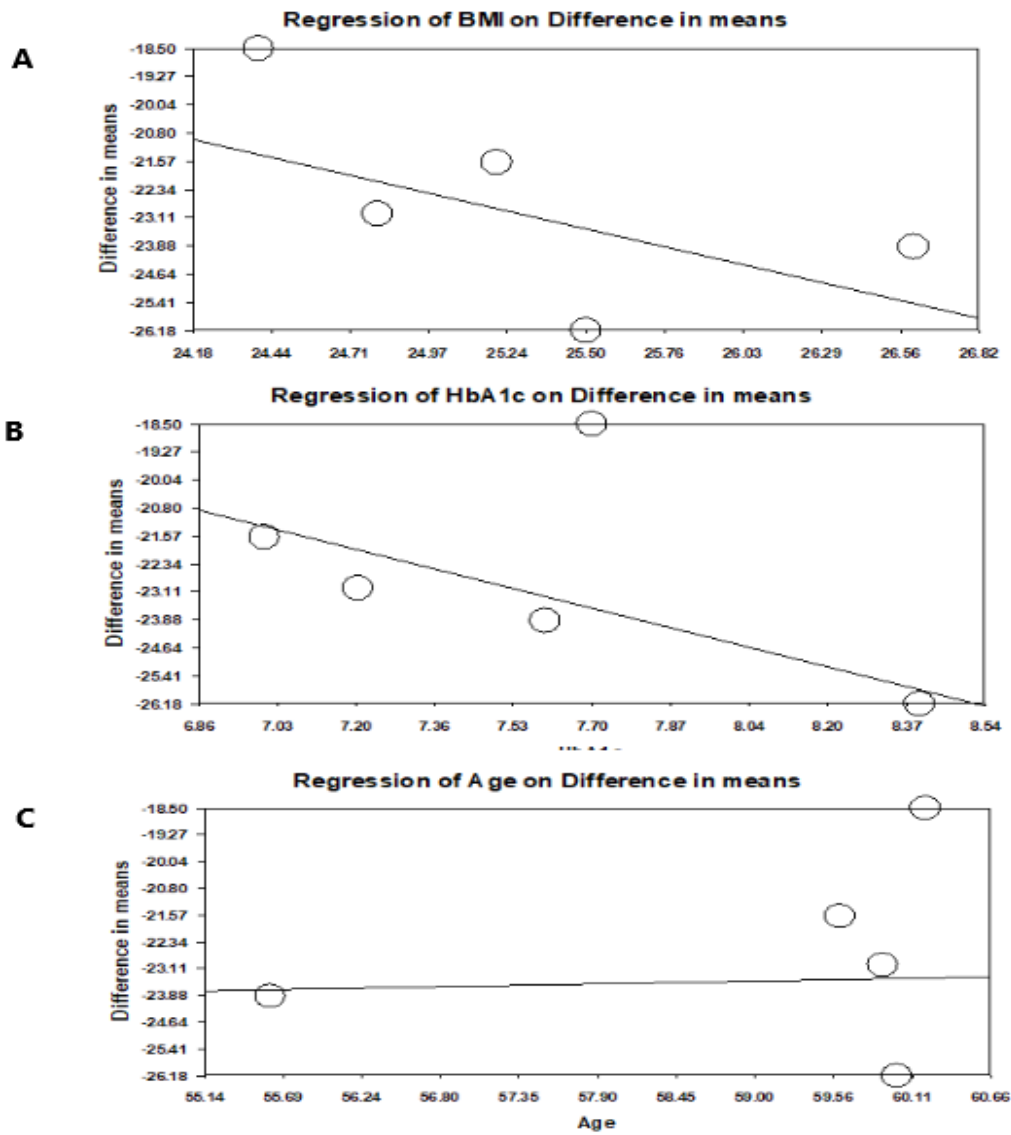

Supplement: 41598_2019_49803_MOESM2_ESM.pdf [file 41598_2019_49803_MOESM2_ESM.pdf]
